# Supplementary material for: Guava Fruit and Acacia pennata Vegetable Intake Association with Frailty of Older Adults in Northern Thailand
Source: MDPI journal article supplement (doi:10.3390/nu14061192), 2022-03-11
Supplement: s1 [file s1]

**Table S1.** Comparison of protien, carbohydrate, and lipid consumption in non-frail and frail older adults.

| Source of Macronutrients <sup>#</sup>          | Total<br>( <i>n</i> = 350), <i>n</i> (%) | Non-Frail<br>( <i>n</i> = 154) <i>n</i> (%) | Frail<br>( <i>n</i> = 196) <i>n</i> (%) | <i>p</i> -Value    |
|------------------------------------------------|------------------------------------------|---------------------------------------------|-----------------------------------------|--------------------|
| Protien sources                                |                                          |                                             |                                         |                    |
| Eggs                                           | 328 (96.7)                               | 148 (45.1)                                  | 180 (54.9)                              | 0.103 <sup>a</sup> |
| Pork                                           | 241 (68.9)                               | 100 (41.5)                                  | 141 (58.5)                              | 0.160 <sup>a</sup> |
| Milk                                           | 184 (52.6)                               | 78 (42.4)                                   | 106 (57.6)                              | 0.523 <sup>a</sup> |
| Fish                                           | 91 (26.1)                                | 45 (49.5)                                   | 46 (20.5)                               | 0.210 <sup>a</sup> |
| Chicken                                        | 11 (3.2)                                 | 7 (63.6)                                    | 4 (36.4)                                | 0.179 <sup>a</sup> |
| Beef/ buffalo meat                             | 2 (0.6)                                  | 1 (50.0)                                    | 1 (50.0)                                | 0.685 <sup>b</sup> |
| Others: peanuts/ bean/ mushroom                | 345 (98.6)                               | 154 (44.6)                                  | 191 (55.4)                              | 0.054 <sup>b</sup> |
| Carbohydrate sources (excluded dietary fibers) |                                          |                                             |                                         |                    |
| Rice <sup>¥</sup>                              | 350 (100.0)                              | -                                           | -                                       | -                  |
| Others: potato/ taro/ corn                     | 223 (63.7)                               | 104 (46.6)                                  | 119 (53.4)                              | 0.188 <sup>a</sup> |
| Others: bread/ cake/ cookie                    | 125 (35.7)                               | 49 (39.2)                                   | 76 (60.8)                               | 0.178 <sup>a</sup> |
| Lipid sources                                  |                                          |                                             |                                         |                    |
| Vegetable oil                                  | 315 (90.0)                               | 141 (44.8)                                  | 174 (55.2)                              | 0.389 <sup>a</sup> |
| Animal oil                                     | 23 (6.6)                                 | 10 (43.5)                                   | 13 (56.5)                               | 0.958 <sup>a</sup> |

<sup>#</sup> Consumed the most often on a weekly basis in the past month; <sup>¥</sup>Rice is a staple food that Thai population eat often everyday or every meal. Significant *p*-value were analyzed by <sup>a</sup> Chi-square test, <sup>b</sup> Fisher's exact test.
