# Supplementary material for: Guava Fruit and Acacia pennata Vegetable Intake Association with Frailty of Older Adults in Northern Thailand
Source: MDPI journal article supplement (doi:10.3390/nu14061192), 2022-03-11
Supplement: s1 [file s1]

## Supplementary File S1. Frailty assessment and dietary intake questionnaire among Northern Thai elders:

There are 3 parts within this questionnaire: Part 1: General information, Part 2: Details of dietary intake and Part 3: Frailty assessment.

### Part 1: General information

1. How old are you? ..... years
2. Are you?
  - Male
  - Female
3. What is your educational level?
  - No school
  - Primary school
  - Secondary school
4. What is your marital status?
  - Single
  - Married
  - Widow/ divorced/ separated
5. What was your occupation in the past?
  - Farmers
  - Merchants
  - Official workers
  - Housekeeper
  - Unemployed
6. How much your income per month (in Thai)?..... Baht
7. Do you have any underlying diseases? Please choose all corresponding to you
  - No
  - Yes....
    - Hypertension
    - Diabetes Mellitus
    - Cardiovascular diseases
    - Stroke
    - Arthritis
    - Osteoporosis
    - Chronic obstructive pulmonary disease (COPD)
    - Others (please specify) .....

### Part 2: Detail of dietary intake

1. What are sources of carbohydrates do you consumed the most often a weekly basis in the past month?  
(Excluded dietary fibers)
  - Rice
  - Others (please specify) .....
2. What are sources of proteins do you consumed the most often a weekly basis in the past month?  
(Please choose 1-3 of them)
  - Pork
  - Beef
  - Chicken
  - Fish
  - Buffalo
  - Others (please specify) .....
3. What are sources of plants-based proteins do you consumed the most often a weekly basis in the past month?  
(Please choose 1-3 of them)
  - Peanut
  - Bean
  - Mushroom
  - Others (please specify) .....

4. What are egg protein sources you consumed the most often a weekly basis in the past month?  
No  
Yes
5. What are milk protein sources you consumed the most often a weekly basis in the past month?  
No  
Yes
6. What are vegetable oil sources you consumed the most often a weekly basis in the past month?  
No  
Yes
7. What are animal oil sources you consumed the most often a weekly basis in the past month?  
No  
Yes
8. What are types of fruits do you consumed the most often a weekly basis in the past month?  
(Please choose 1-5 of them)  
Banana  
Papaya  
Mango  
Orange  
Pineapple  
Guava  
Watermelon  
Rambutan  
Mangosteen  
Durian  
Others (please specify) .....
9. What are types of vegetables do you consumed the most often a weekly basis in the past month?  
(Please choose 1-5 of them)  
Lettuce  
Ivy gourd  
Gurmar  
Malabar spinach  
Collard green  
Long bean  
Morning glory  
Cabbage  
Cauliflower  
Eggplant  
Cucumber  
*Acacia pennata*  
*Melientha suavis*  
Others (please specify) .....

### Part 3: Frailty assessment

1. Unintended weight loss  
Did you have unintended weight loss more than 4.5 kg in the past year?  
No  
Yes
2. Self-reported exhaustion
  - 2.1 How often in the last week did you feel this way, "I felt everything I did was an effort"?  
Rarely or none of the time (<1 day)  
Some or a little of the time (1–2 days)  
A moderate amount of the time (3–4 days)  
Most of the time
  - 2.2 How often in the last week did you feel this way, "I could not get going"?  
Rarely or none of the time (<1 day)  
Some or a little of the time (1–2 days)  
A moderate amount of the time (3–4 days)  
Most of the time

3. Slowness

Time spent for walking along 15-foot..... seconds

4. Weakness

Determined using a handheld dynamometer with non-dominant hand (the maximal force gained from 3 trials)

First ..... kg

Second..... kg

Third..... kg

5. Low physical activities

Do you have low or moderate physical activities such as gardening, car washing, or walking in a park?

Less than once a week

Once a week

1-3 times per month

Less than 1-3 times per month or never

**References**

1. Fried, L.P.; Tangen, C.M.; Walston, J.; Newman, A.B.; Hirsch, C.; Gottdiener, J.; Seeman, T.; Tracy, R.; Kop, W.J.; Burke, G.; et al. Frailty in older adults: evidence for a phenotype. *J. Gerontol. A Biol. Sci. Med. Sci.* **2001**, *56*, M146–M156, doi:10.1093/gerona/56.3.m146.
2. Danilovich, M.K.; Diaz, L.; Corcos, D.M.; Ciolino, J.D. Relationship between SHARE-FI Frailty Scores and Physical Performance Measures in Older Adult Medicaid Recipients. *Geriatrics (Basel)* **2018**, *3*, 51, doi:10.3390/geriatrics3030051.
